# Supplementary material for: Use of a Sibling Subtraction Method for Identifying Causal Mutations in Caenorhabditis elegans by Whole-Genome Sequencing
Source: PubMed Central journal article supplement (PMC5919755; doi:10.1534/g3.117.300135), 2017-12-12

# CloudMap Workflow

**WY1208**

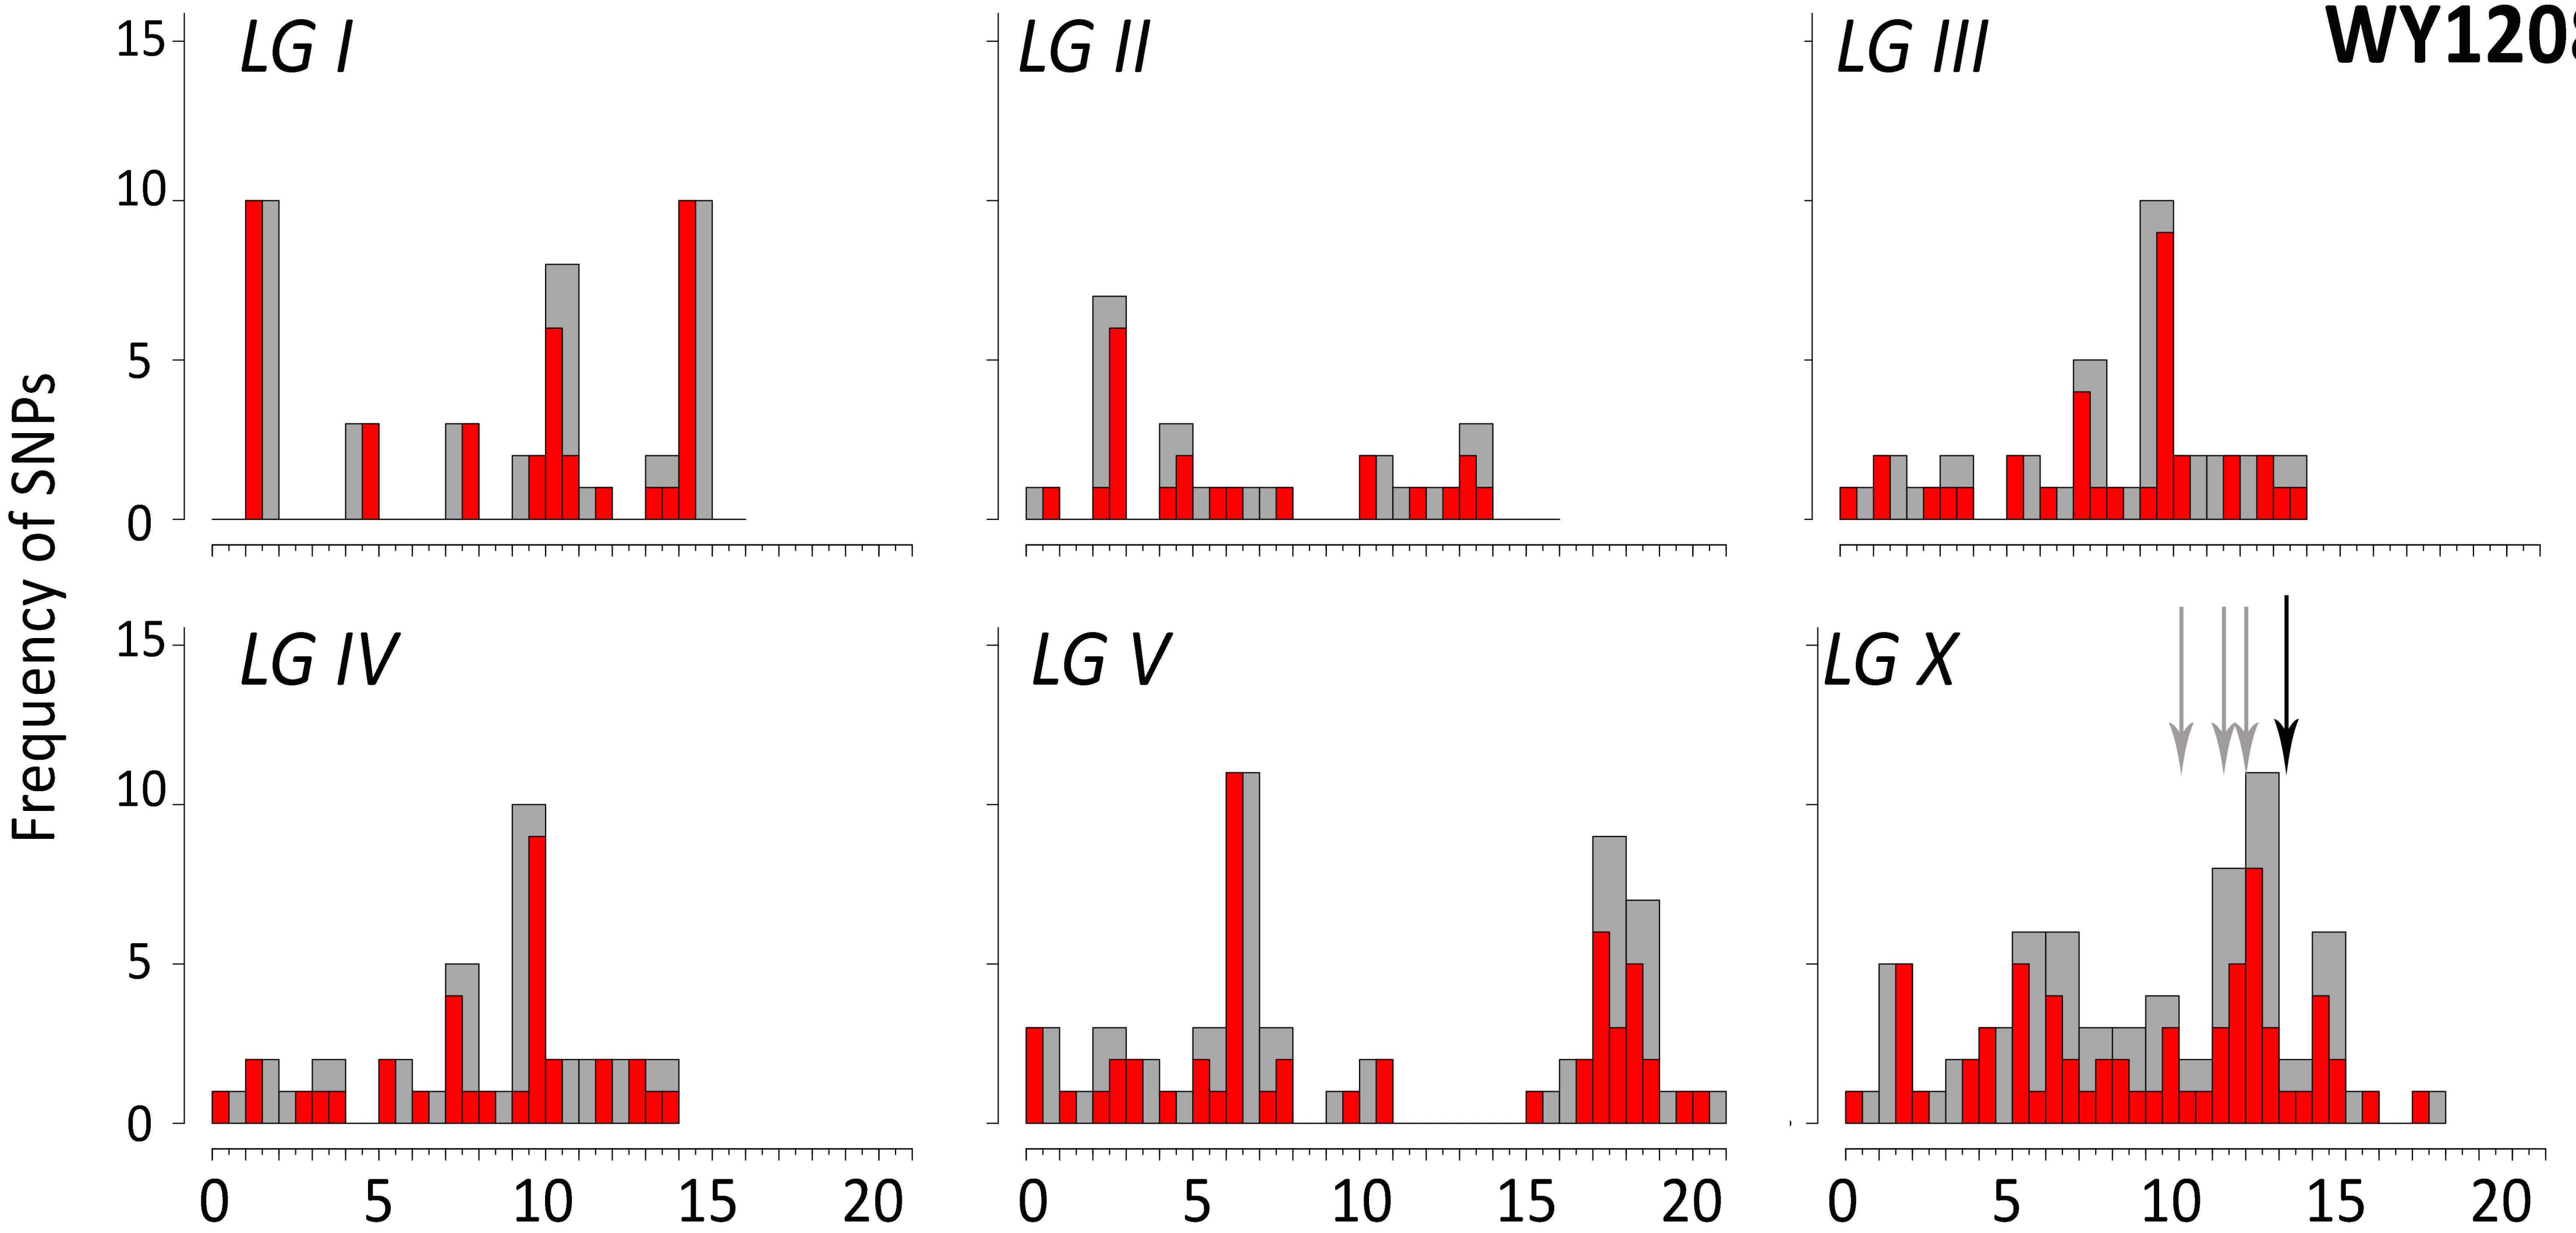

**WY1209**

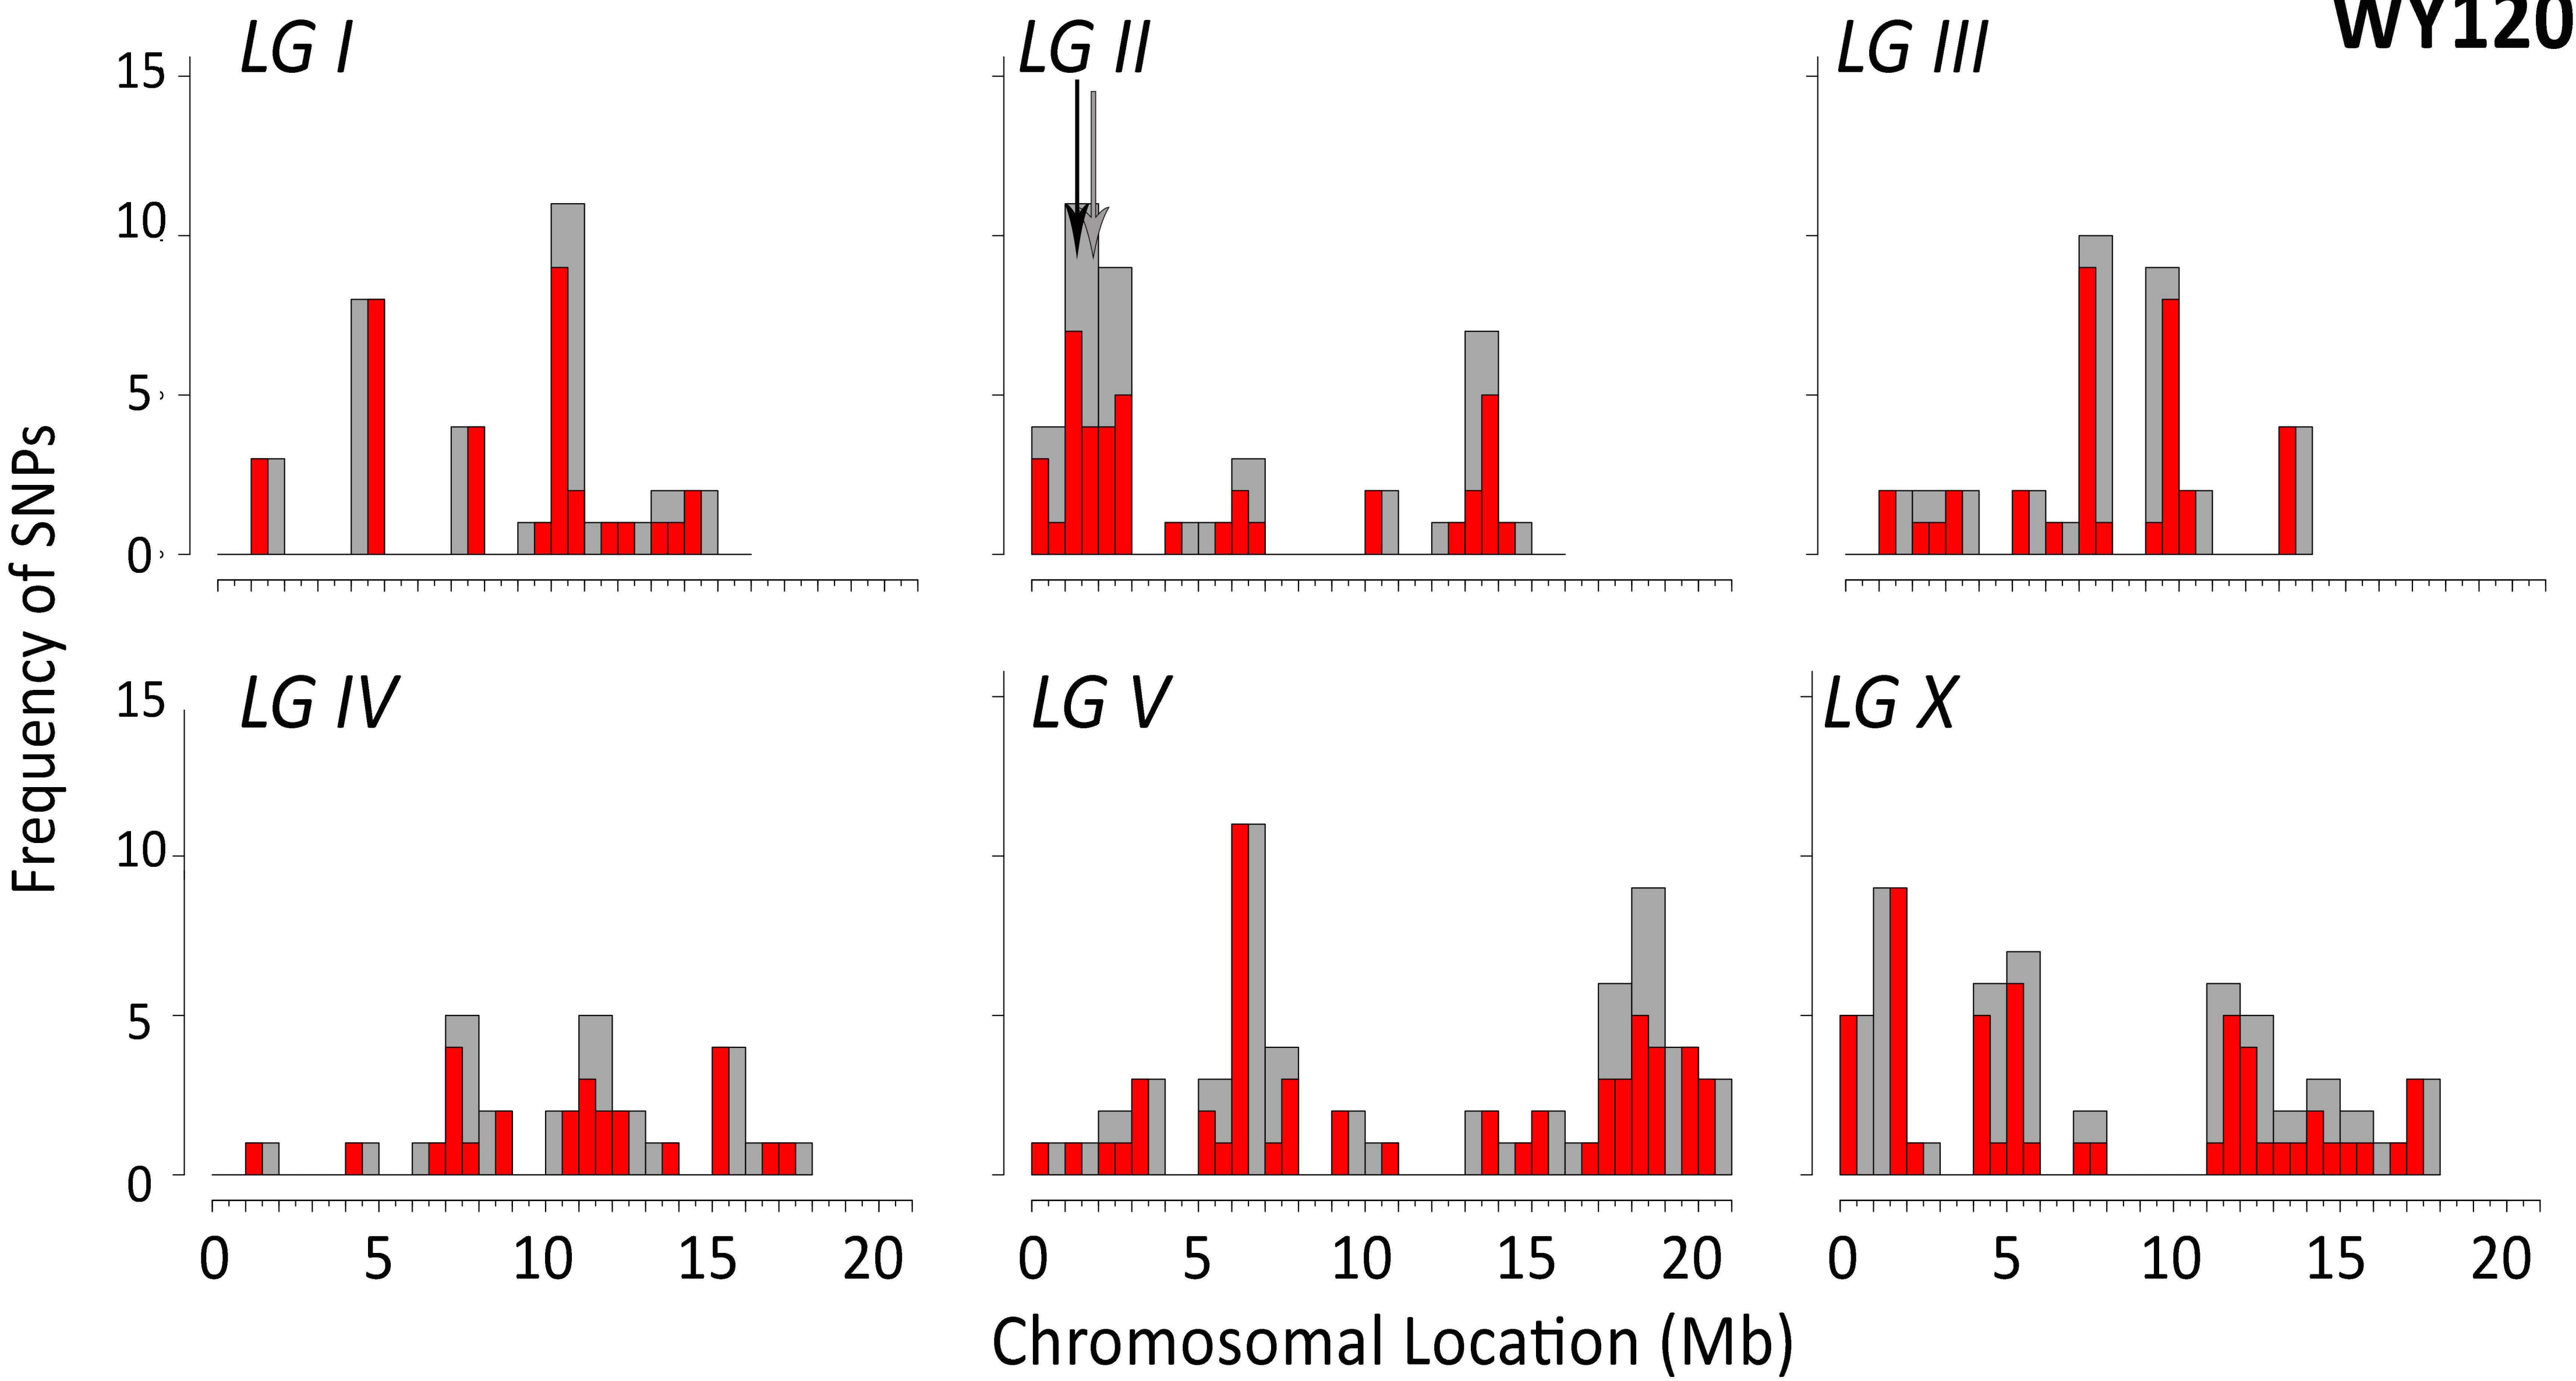

**WY1210**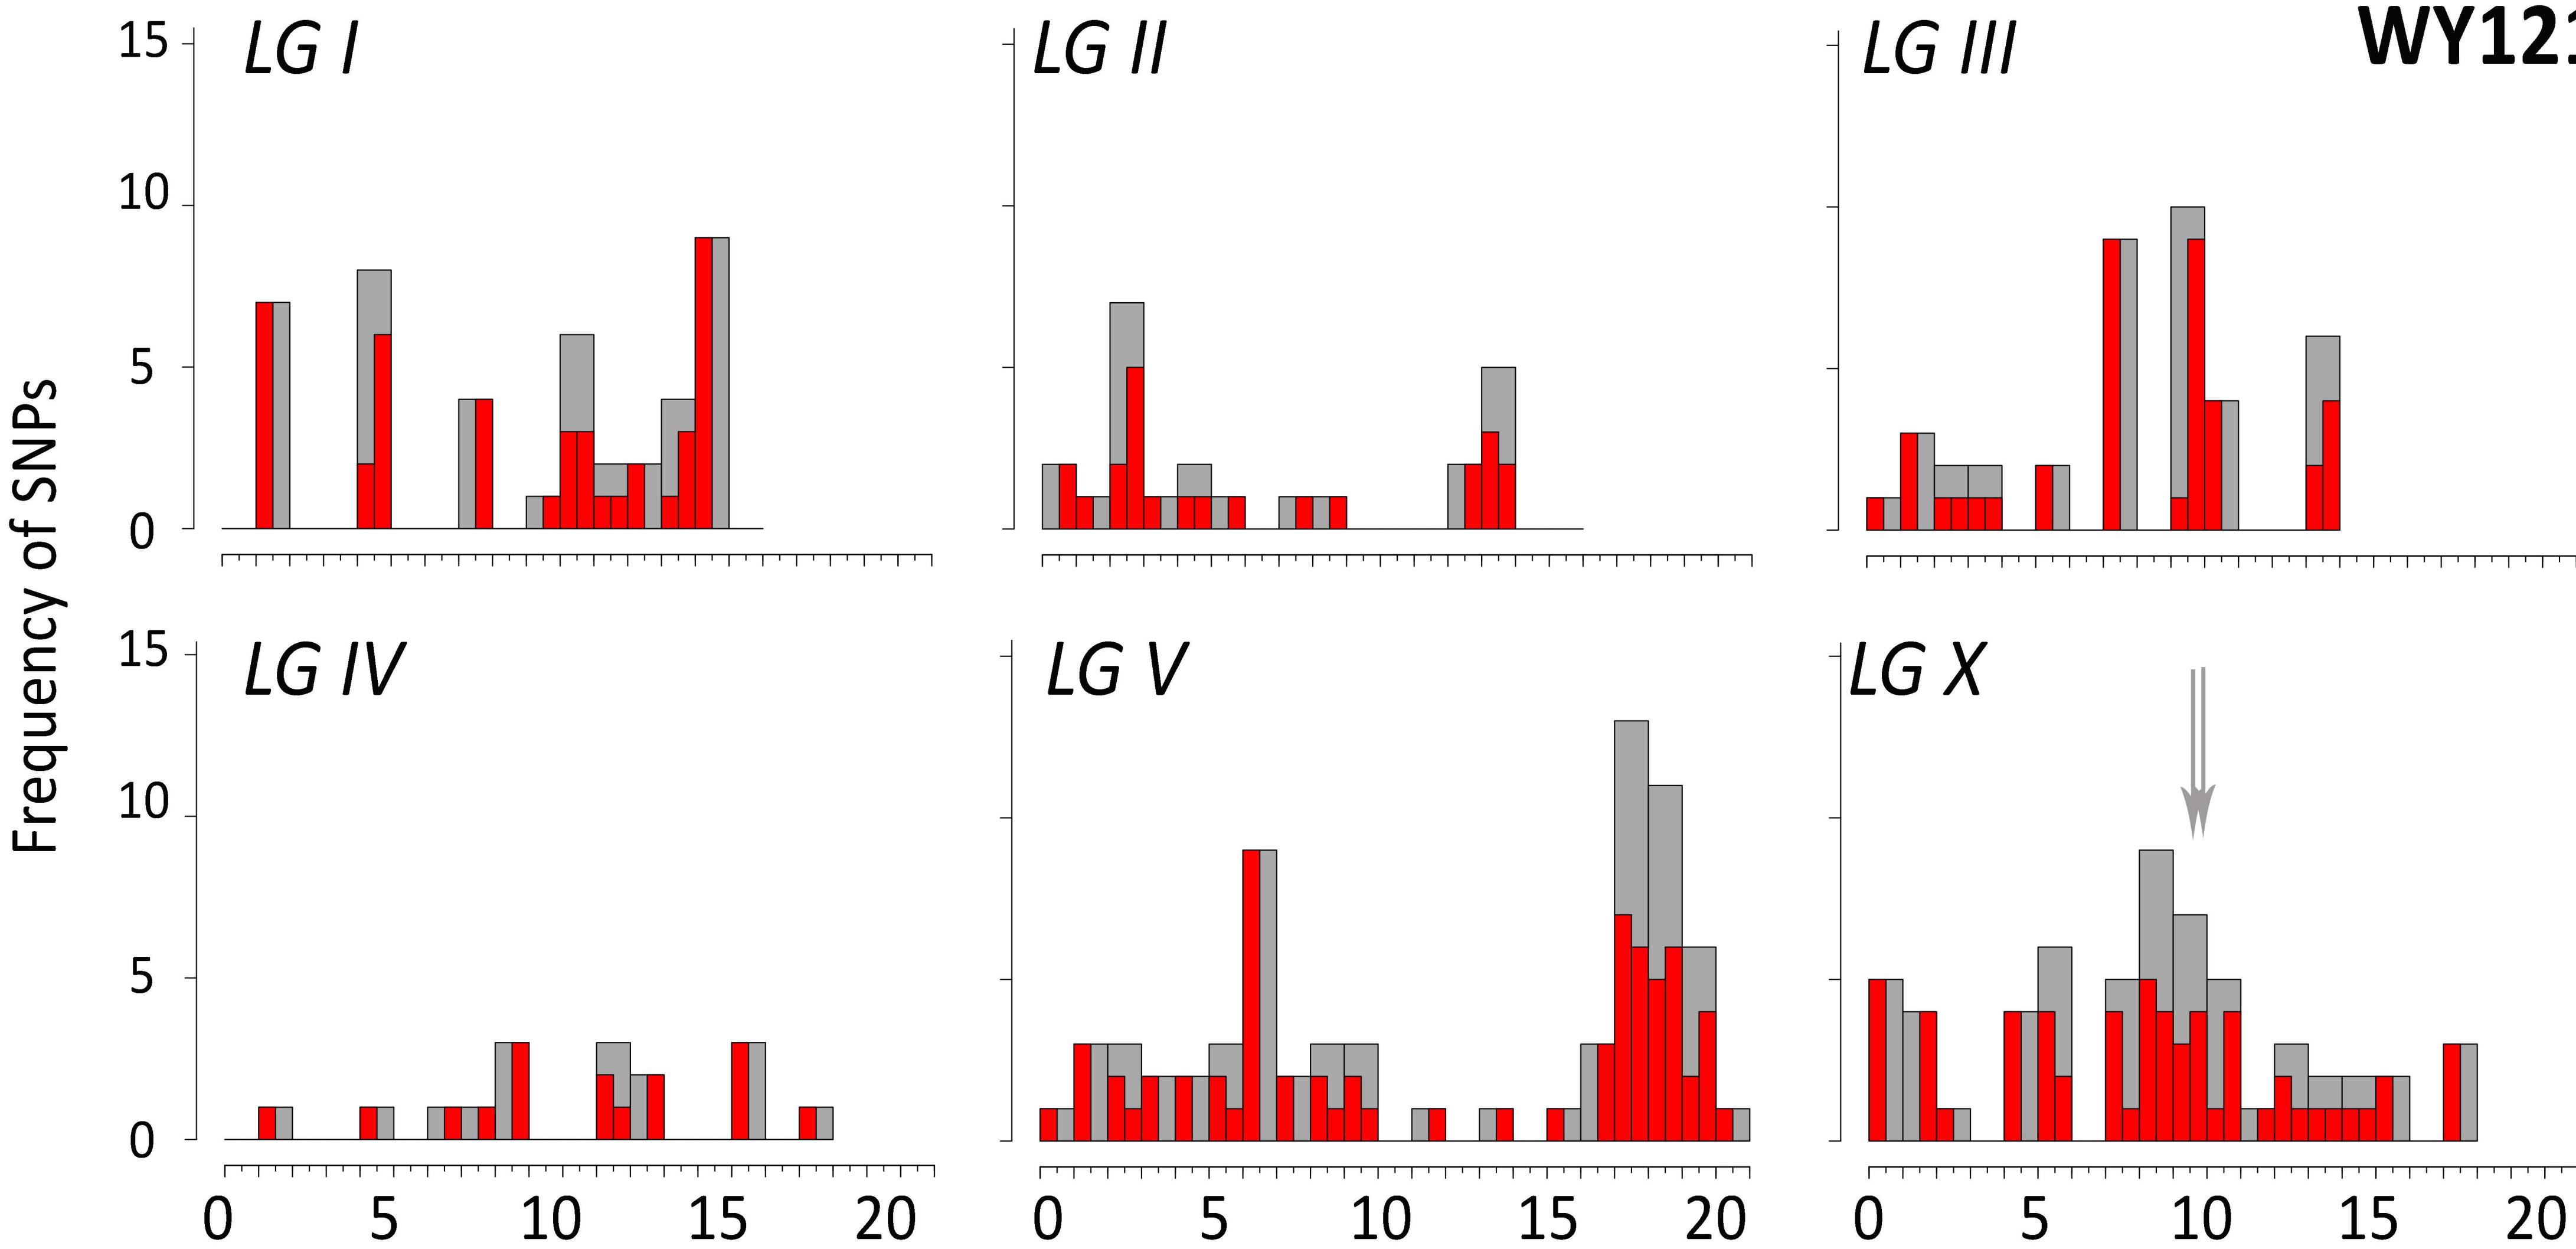**WY1211**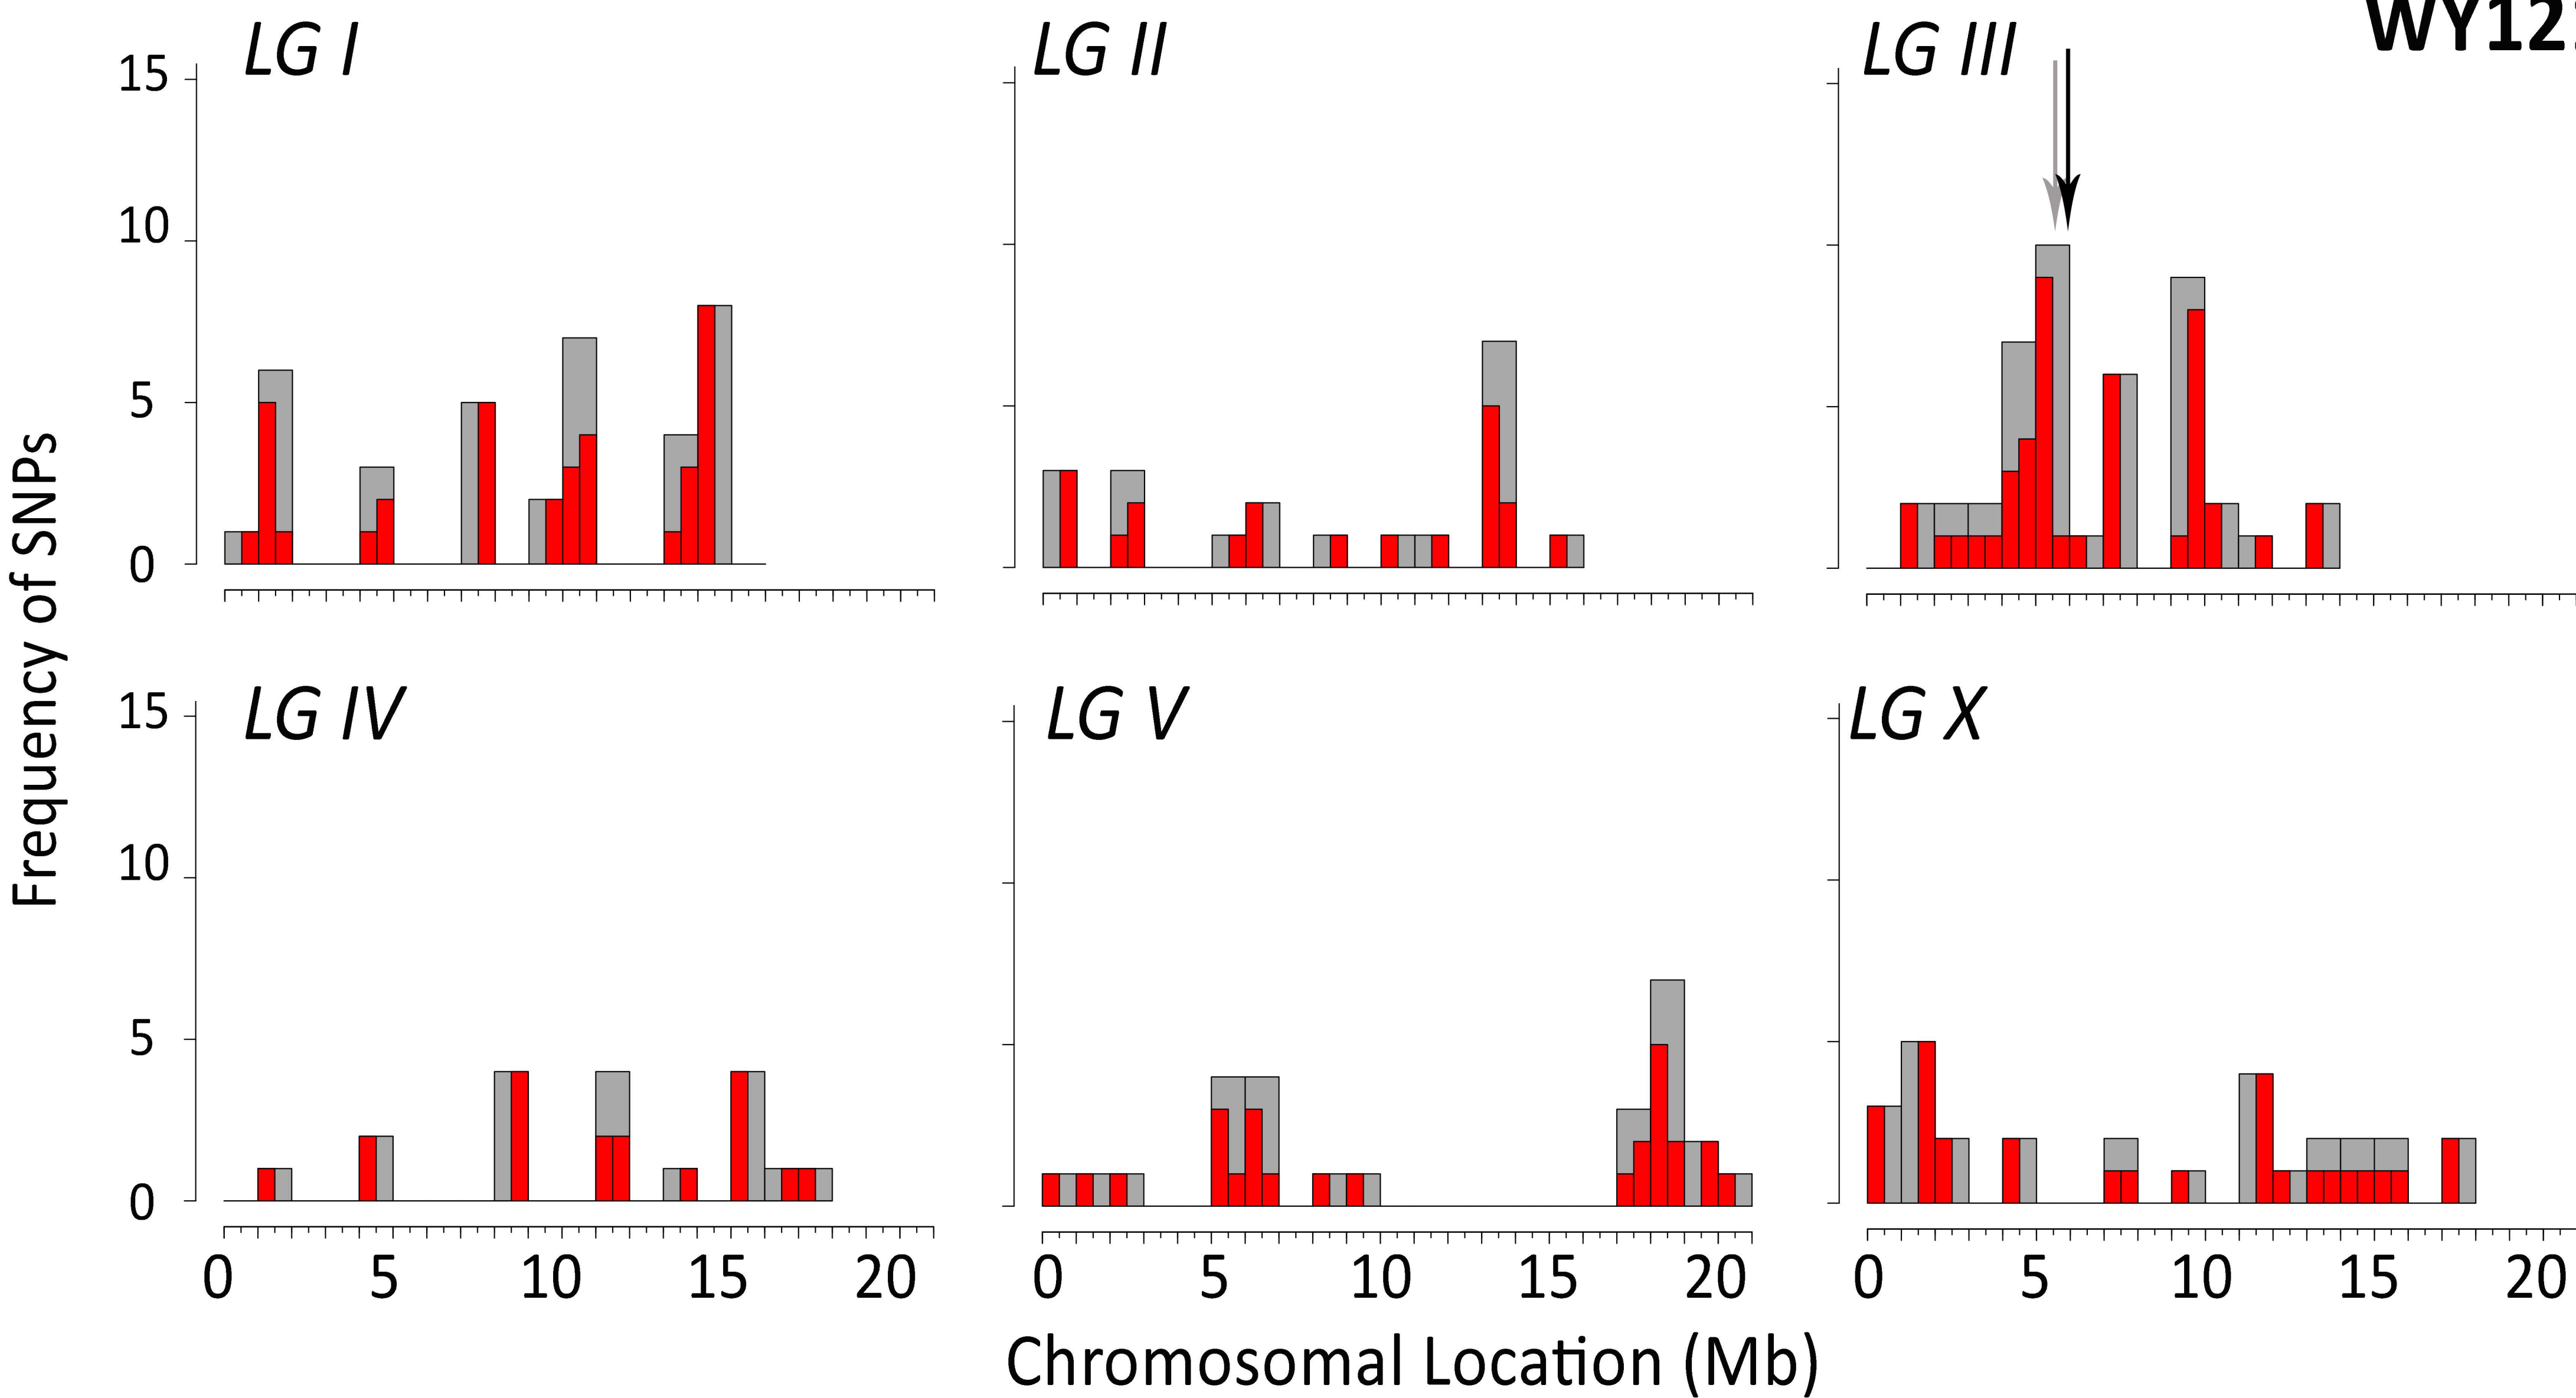

**WY1217**

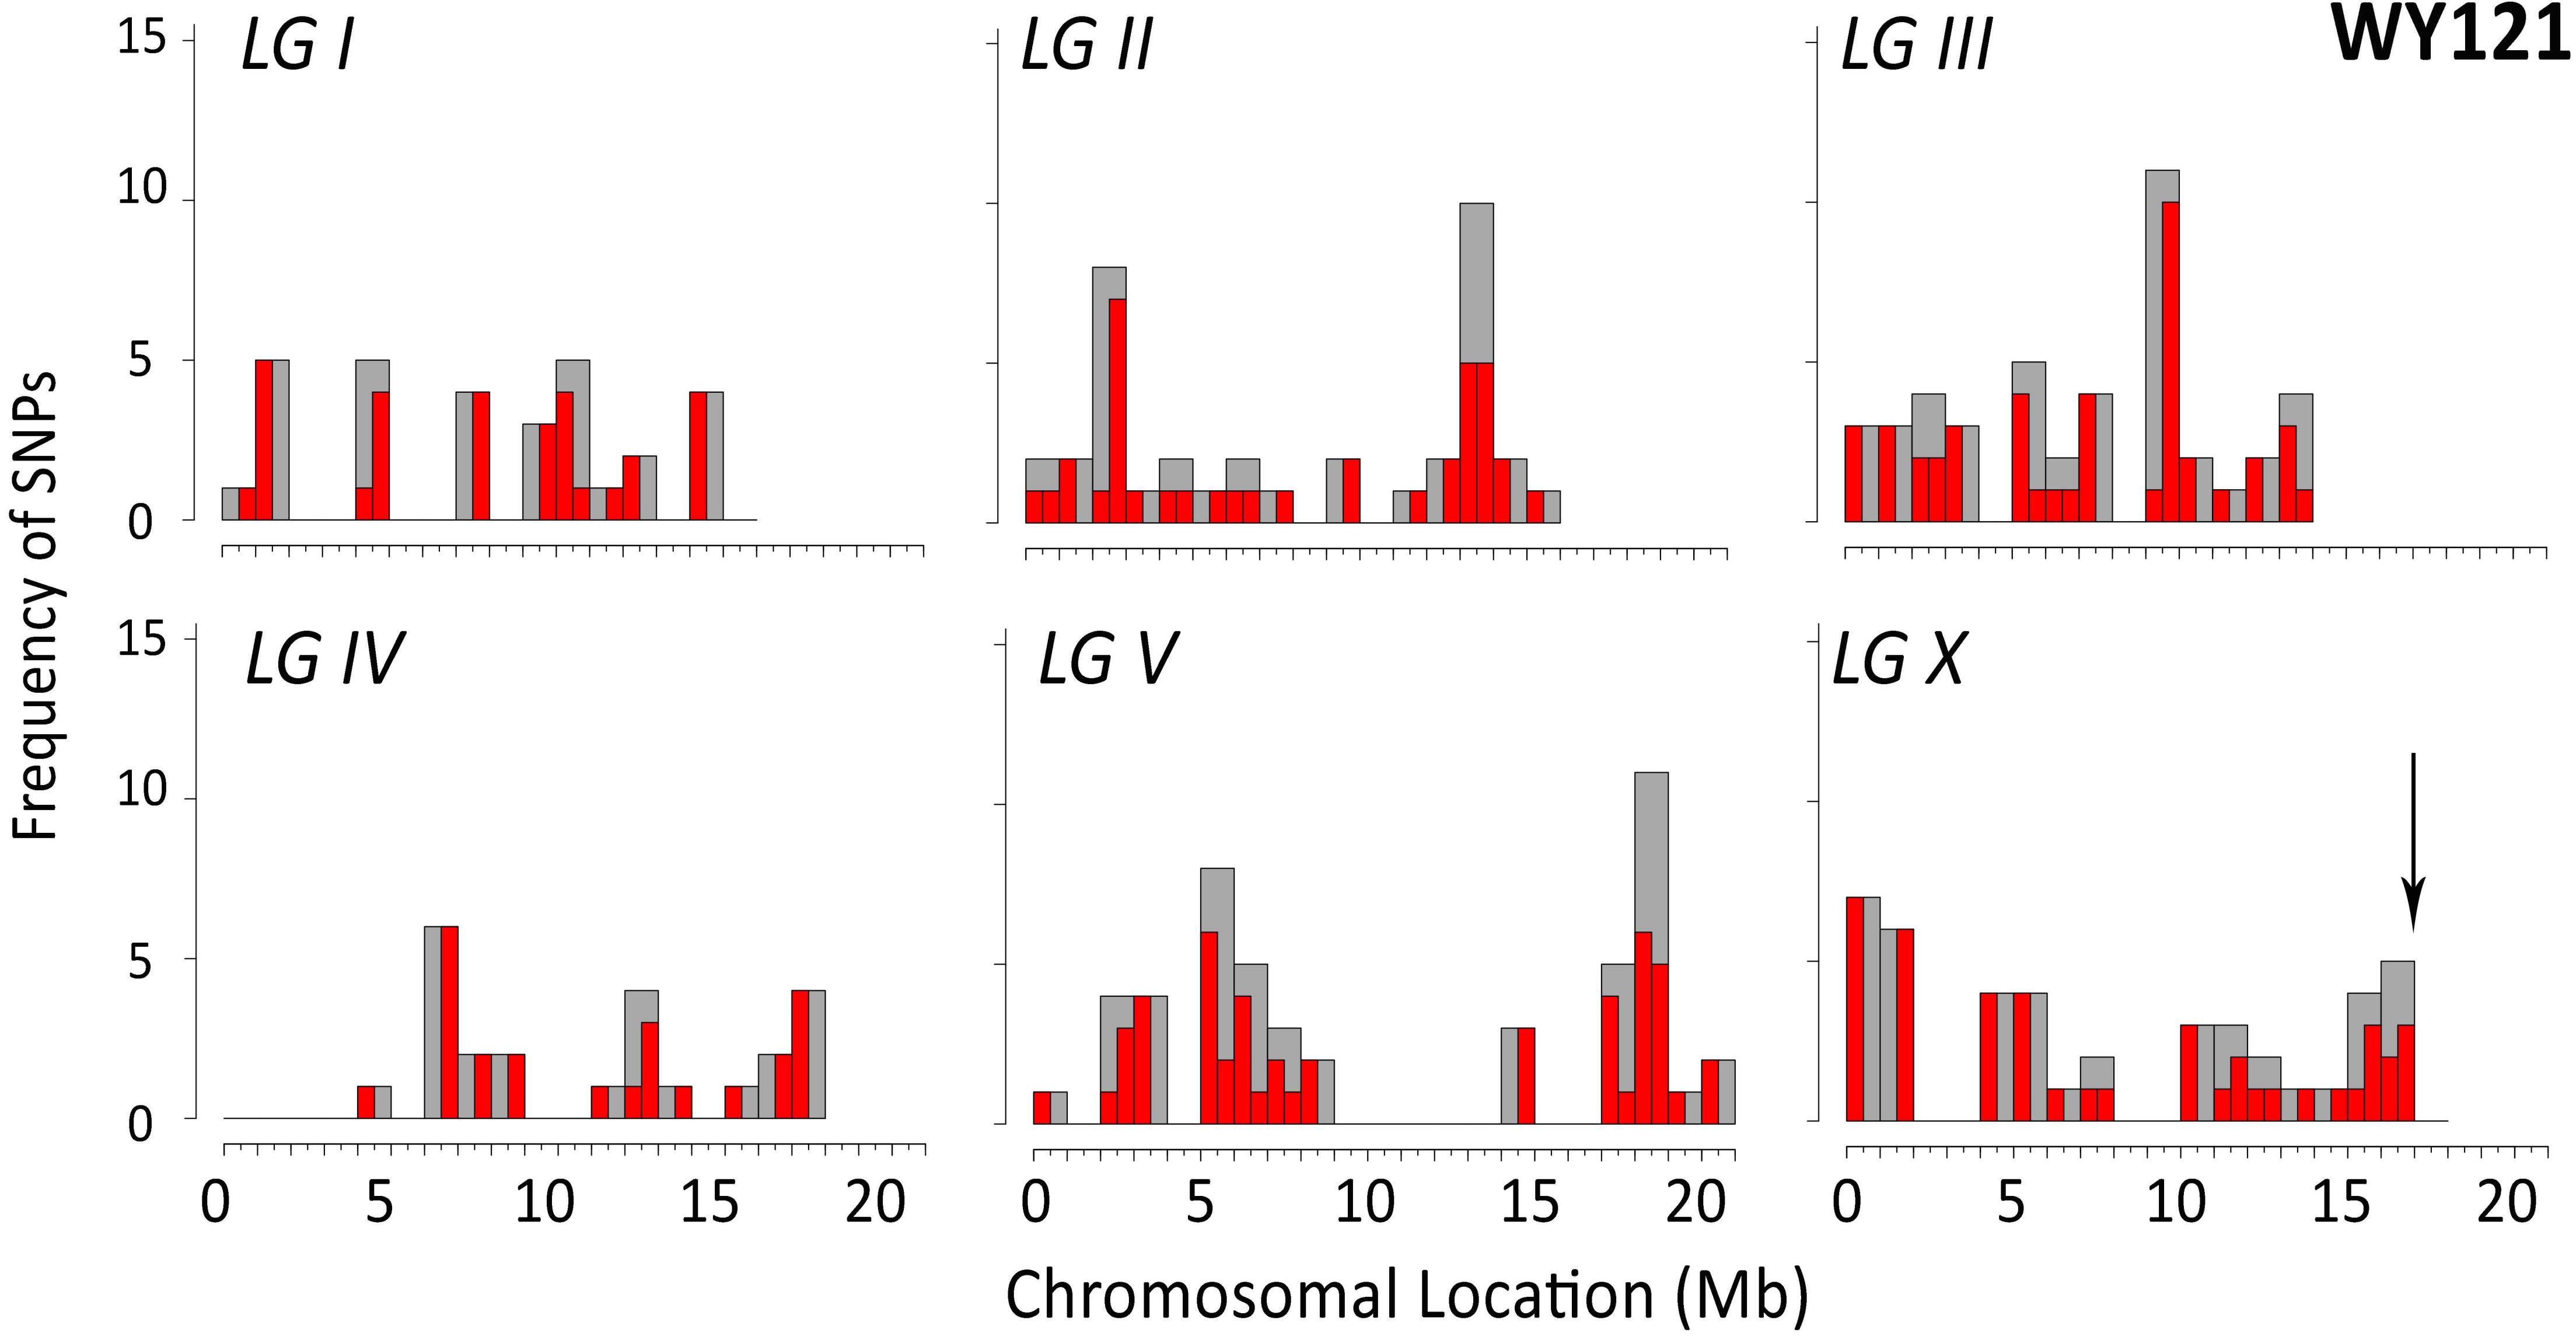

Supplement: 669FigureS4.pdf [file 669FigureS4.pdf]
