# Supplementary material for: Use of a Sibling Subtraction Method for Identifying Causal Mutations in Caenorhabditis elegans by Whole-Genome Sequencing
Source: PubMed Central journal article supplement (PMC5919755; doi:10.1534/g3.117.300135), 2017-12-12
Supplement: 669FileS1.pdf [file 669FileS1.pdf]

### **Oligonucleotides used in this study**

For the following CRISPR targeting RNAs (crRNAs), target-specific sequences have a yellow background. For repair templates, altered nucleotides are in red, altered restriction endonucleases are underlined, and crRNA target sequences have a yellow background. For dsRNA template primers, target-specific sequences are underlined.

#### **C04A11.4 (WY1208; *fd130*)**

crRNA: 5'-CAGGAGUUCUGUUACGAAGGGUUUUAGAGCUAUGCU-3'

Alt-RTM CRISPR-Cas9 tracrRNA: IDT (CA#1072534) was used for all CRISPR injections.

Locus amplification: 5'-CCACCGAACAAACCCAATTG-3' and 5'-CGGAGCATTTAAGCCACCAT-3'

Locus sequencing: 5'-ATATTCGGTCATTGTGGCCC-3' and 5'-CTGGGTTTCACACTGCAACA-3'

#### **F56D12.6 (WY1209; *fd131*)**

crRNA: 5'-GCUCGAUCGGAAGCCGGCGCGUUUUAGAGCUAUGCU-3'

Locus amplification: 5'-GACTATCGCCTCAACTCAGA-3' and 5'-CTTCTCTATTTCCGCAGCTC-3'

Locus sequencing: 5'-GGAAGCGTGGATTCTGTGAT-3' and 5'-CAGCGAGCACCTTTTTACGA-3'

dsRNA primers: 5'-TAATACGACTCACTATAGGGAGAGGACGATTGGCGGAACAAAA-3' and

5'-TAATACGACTCACTATAGGGAGAGTGTCCAGGTTTCAATTTCC-3'

#### **B0302.1 (WY1217; *fd139*)**

crRNA: 5'-TGAGCCGATTCTCTCGTCTGGUUUUAGAGCUAUGCU-3'

Locus amplification: 5'-GCAACACGCCTATCACAGTT-3' and 5'-TCCGGAGAATCTGTTCTCTG-3'

Locus sequencing: 5'-TCAAATGTCGGACGAGGAGA-3' and 5'-CATTTAACTGAGGGTACCCG-3'

dsRNA primers: 5'-TAATACGACTCACTATAGGGAGACCATTTCGAATATGCCCGCAA-3' and

5'-TAATACGACTCACTATAGGGAGATGAGTCACTGGTTTTGCCTG-3'

#### **F48E8.5 (WY1211; *fd133*)**

crRNA: 5'-GCAAAGAGTTTGAAGCGAATGUUUUAGAGCUAUGCU-3'

Locus amplification: 5'-GTTTCTCAATCCGCGAGGCA-3' and 5'-TCGATTACAAGCCGAGTGCT-3'

Locus sequencing: 5'-GGAGCAGATTCTGAAGGAGA-3' and 5'-ACAGTTCTTGGCTTCTCTG-3'

Repair template:

5'-CTTGTGAGGATGACGTGCCGAATGTCAGATTCAACGCCGCAAAGAGTTTAAAGCGAA

TTGAAAGAACTTGACCCCAAGGTGACAGGAAAATCTTTTTCACTATCCCAATTT-3'

(Creates Dral site)

#### **W07E11.1**

crRNA: 5'-TCAAACCTTTGCACGGAGAACGUUUUAGAGCUAUGCU-3'

Locus amplification: 5'-CTCAGAAGCTGGAGTTGGAA-3' and 5'-TCTCTCCAGCAACTCCTCTA-3'

Locus sequencing: 5'-GTGCTCAGATGAACAACCT-3' and 5'-AATGGATCCGAACCTCGAGCA-3'

Repair template:

GATGAGAAAATGTCACTTGAACACCTGCCCGTTGGAGTCGCTACTCAAGATCTTGTTCTCCGTGCAAAGTTTGA

TGGAAAGCCAGAACACGTTGTCAACTATATG

(Creates BglII site)

dsRNA primers:

5'-TAATACGACTCACTATAGGGGAGAACTTAAAGTGCGCTAACCCG-3' and  
5'-TAATACGACTCACTATAGGGGAGACCACCAGAGAGACATTTTCC-3'

#### T09B9.4

crRNA: 5'-GCTTGTGGAATGTGCAATCGUUUUAGAGCUAUGCU-3'

Locus amplification: 5'-ATCAGGAGGAATTGATGCGC-3' and 5'-CGGCTTCGATACGAATAGCT-3'

Repair template:

ATCGTCAGCAACTCAACGAACTGCCATTTGCACATTGAAAACAAAAAGCTAGTTGGAATATGCAATCAAGAGA  
GACGTGCATCGCAAGCTACAGAGGCTGAAGTCAAAAAATgtagtga

(Ablates HindIII site)

dsRNA primers:

5'-TAATACGACTCACTATAGGGGAGAACACCGCTGCCTGATAATCA-3' and

5'-TAATACGACTCACTATAGGGGAGATGACTTCAGCCTCTGTAGCT-3'

#### F53A9.7

crRNA: 5'-GCTTGTGGAATGTGCAATCTCAGTGTGAACAACAGTTGG-3'

Locus amplification: 5'-GATCGGGCGTCAAAAATGGG-3' and 5'-ACTACACCACTTTGAAGAAACA-3'

Repair template:

CATACGGAGGACACGGAGGATATGCTCCACCACAGTCCATGGAGCTCCAGATAACATGCCACCGACGGTCGTT  
CACACTGACGGAGGACATCACGGACACGTTGACACCCATCACCATGA

(Creates Hpy188III site)

#### T05A10.1

crRNA: 5'-GCTTGTGGAATGTGCAATCATGCATGTCCGCTCCACCTG-3'

Locus amplification: 5'-ATAGCGATGGAACGACACCA-3' and 5'-GGATACCTGAGAGTTGGAAGG-3'

Repair template:

AACGATCACTATTGGCCTTCGCCGATCGTGCATCATGCATGTCCGCTCCATCTGTAGCAATGCAACGTGACTTTG  
ATGACCGAGGTGTGTGAACTCGGATCTGGAT

(Creates SfiI site)

#### R04E5.10

crRNA: 5'-GCTTGTGGAATGTGCAATCATTGAAATCTCCGAATTTAA-3'

Locus amplification: 5'-AGCACAAAGATGAATCAATCGTCA-3' and 5'-TGACTGTACGATACGTGTGCAT-3'

Repair template:

ATATATTA AAAACAATTACAGATTCATTCATTGAAATCTCCGAATTTAATGATGATATGTTGCTACTCAAATCTA  
CAGCTTCGATTTCTCAAAAACACAAAGACAGTT

(Creates EcoRV site)

#### WGS, variant detection, and sibling subtraction method (SSM)

Our sequencing effort was designed to provide 20× average coverage of the *C. elegans* genome (105 Mb) to provide adequate depth to detect causative single-nucleotide polymorphisms (SNPs) in our experimental datasets. 2×125 paired-end library construction (150-bp insert) and sequencing were performed using the Tru-Seq DNA PCR-free Library Preparation Kit, and all

samples were sequenced in one lane on an Illumina HiSeq2000. We sequenced genomes from the non-mutant comparator for each mutant and also each of the five mutants described in this paper. All raw Illumina data are deposited in the NCBI Sequence Read Archive (<http://trace.ncbi.nlm.nih.gov/Traces/sra>) (BioProject ID PRJNA415825). Quality assessment was carried out with FastQC (<http://www.bioinformatics.babraham.ac.uk/projects/fastqc/>). Residual adapters and low-quality and short reads were removed via Trimmomatic v0.35 (BOLGER *et al.* 2014).

Following quality control, we performed the remaining analyses with Galaxy (AFGAN *et al.* 2016) following a modified version of the CloudMap protocol (MINEVICH *et al.* 2012). Protocols described below (*SSM Variant Detection* and *SSM Variant Subtraction*) can be accessed through the shared workflows on UseGalaxy.org. Individual tools used in Galaxy are noted in italics below (LI AND DURBIN 2009; LI *et al.* 2009; MCKENNA *et al.* 2010; CINGOLANI *et al.* 2012a; CINGOLANI *et al.* 2012b).

| Tool                                                                     | Function                                                  | Parameters                                                                                                                                                                                                                                                                                                                                                                                                                                                                                                                                                                                                                                                                                                                                                                                                                                                                                                                                                                                                                                                                                                                                                                                                                                                                                                                                                                                                                                                                                                                                                                     |
|--------------------------------------------------------------------------|-----------------------------------------------------------|--------------------------------------------------------------------------------------------------------------------------------------------------------------------------------------------------------------------------------------------------------------------------------------------------------------------------------------------------------------------------------------------------------------------------------------------------------------------------------------------------------------------------------------------------------------------------------------------------------------------------------------------------------------------------------------------------------------------------------------------------------------------------------------------------------------------------------------------------------------------------------------------------------------------------------------------------------------------------------------------------------------------------------------------------------------------------------------------------------------------------------------------------------------------------------------------------------------------------------------------------------------------------------------------------------------------------------------------------------------------------------------------------------------------------------------------------------------------------------------------------------------------------------------------------------------------------------|
| <b><i>Map with BWA for Illumina</i></b><br><b>[Galaxy version 1.2.3]</b> | Aligns reads to the <i>C. elegans</i> WS220 (ce10) genome | <ul style="list-style-type: none"> <li>The parameters used for alignment were as follows: Library mate-paired = Paired-end, Maximum edit distance (aln -n) = 0</li> <li>Fraction of missing alignments given 2% uniform base error rate (aln -n) = 0.04</li> <li>Maximum number of gap opens (aln -o) = 1, Maximum number of gap extensions (aln -e) = -1</li> <li>Disallow long deletion within [value] bp towards the 3'-end (aln -d) = 16</li> <li>Disallow insertion/deletion within [value] bp towards the end (aln -i) = 5</li> <li>Number of first subsequences to take as seed (aln -l) = -1, Maximum edit distance in the seed (aln -k) = 2</li> <li>Mismatch penalty (aln -M) = 3</li> <li>Gap open penalty (aln -O) = 11</li> <li>Gap extension penalty (aln -E) = 4</li> <li>Proceed with suboptimal alignments if there are no more than INT equally best hits (aln -R) = Null</li> <li>Disable iterative search (aln -N) = No</li> <li>Maximum number of alignments to output in the XA tag for reads paired properly (samse/sampe -n) = 3</li> <li>Maximum number of alignments to output in the XA tag for discordant read pairs (excluding singletons) (sampe -N) = 10, Maximum insert size for a read pair to be considered as being mapped properly (sampe -a) = 500</li> <li>Maximum occurrences of a read for pairing (sampe -o) = 100000</li> <li>Specify the read group for this file? (samse/sampe -r) = No</li> <li>Suppress the header in the output SAM file = No</li> <li>Job Resource Parameters = Use default job resource parameters</li> </ul> |

|                                                        |                                                                                                                           |                                                                                                                                                                                                                                                                                                                                                                                                                                                                                                                                                                                                                                                                                                                                                                                                                                                                                                                                                                                                                                                                                                                                                                                                                                                                                                                 |
|--------------------------------------------------------|---------------------------------------------------------------------------------------------------------------------------|-----------------------------------------------------------------------------------------------------------------------------------------------------------------------------------------------------------------------------------------------------------------------------------------------------------------------------------------------------------------------------------------------------------------------------------------------------------------------------------------------------------------------------------------------------------------------------------------------------------------------------------------------------------------------------------------------------------------------------------------------------------------------------------------------------------------------------------------------------------------------------------------------------------------------------------------------------------------------------------------------------------------------------------------------------------------------------------------------------------------------------------------------------------------------------------------------------------------------------------------------------------------------------------------------------------------|
| <b>Filter SAM</b><br><b>[Galaxy version 1.0.0]</b>     | Removes Orphaned and misaligned pairs                                                                                     | <ul style="list-style-type: none"> <li>• 1: Flag<br/>Read is paired = Yes</li> <li>• 2: Flag<br/>Read is mapped in proper pair = Yes</li> </ul>                                                                                                                                                                                                                                                                                                                                                                                                                                                                                                                                                                                                                                                                                                                                                                                                                                                                                                                                                                                                                                                                                                                                                                 |
| <b>Add or Replace Groups</b> [Galaxy version 1.56.0]   | Alters BAM file read groups                                                                                               | <ul style="list-style-type: none"> <li>• Read group ID (ID tag) = 1</li> <li>• Read group sample name (SM tag) = rgSM,</li> <li>• Read group library (LB tag) = rgLB</li> <li>• Read group platform (PL tag) = rgPU</li> <li>• Specify additional (optional) arguments = Use pre-set defaults</li> <li>• Output bam instead of sam = Yes.</li> </ul>                                                                                                                                                                                                                                                                                                                                                                                                                                                                                                                                                                                                                                                                                                                                                                                                                                                                                                                                                            |
| <b>Realigner Target Creator</b> [Galaxy version 0.0.4] | Identifies Intervals for local realignment                                                                                | <p><b>[(1)]</b> Basic GATK options:</p> <ul style="list-style-type: none"> <li>• How strict should we be in validating the pedigree information = STRICT</li> <li>• Interval set rule = UNION</li> <li>• Type of reads downsampling to employ at a given locus = NONE</li> <li>• Type of BAQ calculation to apply in the engine = OFF,</li> <li>• BAQ gap open penalty (Phred Scaled) = 40</li> <li>• Use the original base quality scores from the OQ tag = No</li> <li>• Value to be used for all base quality scores when some are missing = -1</li> <li>• How strict should we be with validation = STRICT</li> <li>• Interval merging rule = ALL</li> <li>• Disable experimental low-memory sharing functionality = No</li> <li>• Makes the GATK behave non-deterministically that is, the random numbers generated will be different in every run = No.</li> </ul> <p><b>[(2)]</b> Basic Analysis options:</p> <ul style="list-style-type: none"> <li>• Window size for calculating entropy or SNP clusters (windowSize) = 10</li> <li>• Fraction of base qualities needing to mismatch for a position to have high entropy (mismatchFraction) = 0.15</li> <li>• Minimum reads at a locus to enable using the entropy calculation (minReadsAtLocus) = 4</li> <li>• Maximum interval size = 500</li> </ul> |
| <b>Indel Realigner</b> [Galaxy version 0.0.6]          | Performs Local alignment based on sequence intervals identified by <i>Realigner Target Creator</i> [Galaxy version 0.0.4] | <p>Basic GATK and Basic Analysis options:</p> <ul style="list-style-type: none"> <li>• LOD threshold above which the realigner will proceed to realign = 5.0</li> <li>• Use only known indels provided as RODs = No</li> </ul> <p><b>[(1)]</b> Basic GATK options:</p> <ul style="list-style-type: none"> <li>• How strict should we be in validating the pedigree information = STRICT, Interval set rule = UNION</li> <li>• Type of reads downsampling to employ at a given locus = NONE</li> <li>• Type of BAQ calculation to apply in the engine = OFF</li> <li>• BAQ gap open penalty (Phred Scaled) = 40.0</li> </ul>                                                                                                                                                                                                                                                                                                                                                                                                                                                                                                                                                                                                                                                                                     |

|                                                                |                                                                                                                    |                                                                                                                                                                                                                                                                                                                                                                                                                                                                                                                                                                                                                                                                                                                                                                                                                                                                                                                                                                                                                                                                                                                                                                                                                                                                                                                          |
|----------------------------------------------------------------|--------------------------------------------------------------------------------------------------------------------|--------------------------------------------------------------------------------------------------------------------------------------------------------------------------------------------------------------------------------------------------------------------------------------------------------------------------------------------------------------------------------------------------------------------------------------------------------------------------------------------------------------------------------------------------------------------------------------------------------------------------------------------------------------------------------------------------------------------------------------------------------------------------------------------------------------------------------------------------------------------------------------------------------------------------------------------------------------------------------------------------------------------------------------------------------------------------------------------------------------------------------------------------------------------------------------------------------------------------------------------------------------------------------------------------------------------------|
|                                                                |                                                                                                                    | <ul style="list-style-type: none"> <li>• Use the original base quality scores from the OQ tag = No</li> <li>• Value to be used for all base quality scores, when some are missing = -1</li> <li>• How strict should we be with validation = STRICT</li> <li>• Interval merging rule = ALL</li> <li>• Disable experimental low-memory sharing functionality = No<br/>Makes the GATK behave non-deterministically that is, the random numbers generated will be different in every run = No.</li> </ul> <p><b>[(2)] Basic Analysis options:</b></p> <ul style="list-style-type: none"> <li>• Percentage of mismatching base quality scores at a position to be considered having high entropy = 0.15</li> <li>• Simplify BAM = No</li> <li>• Consensus Determination Model = USE_READS</li> <li>• Maximum insert size of read pairs that we attempt to realign = 3000</li> <li>• Maximum positional move in basepairs that a read can be adjusted during realignment = 200</li> <li>• Max alternate consensus to try = 30</li> <li>• Max reads (chosen randomly) used for finding the potential alternate consensus = 120</li> <li>• Max reads allowed at an interval for realignment = 20000</li> <li>• Don't output the original cigar or alignment start tags for each realigned read in the output bam = No</li> </ul> |
| <b>Mark Duplicate Reads [Galaxy version 1.56.0]</b>            | Removes Duplicate reads                                                                                            | <ul style="list-style-type: none"> <li>• Remove duplicates from output file = Yes</li> <li>• Assume reads are already ordered = Yes</li> <li>• Regular expression that can be used to parse read names in the incoming SAM file = [a-zA-Z0-9]+:[0-9]:([0-9]+):([0-9]+):([0-9]+).*</li> <li>• The maximum offset between two duplicate clusters in order to consider them optical duplicates = 100</li> </ul>                                                                                                                                                                                                                                                                                                                                                                                                                                                                                                                                                                                                                                                                                                                                                                                                                                                                                                             |
| <b>Generate pileup from BAM dataset [Galaxy version 1.1.2]</b> | Generates pileup file                                                                                              | <ul style="list-style-type: none"> <li>• Whether or not to print the mapping quality as the last column = Do not print the mapping quality as the last column</li> <li>• Whether or not to print only output pileup lines containing indels = print all lines</li> <li>• Where to cap mapping quality = 30</li> <li>• Call consensus according to MAQ model? = No</li> </ul>                                                                                                                                                                                                                                                                                                                                                                                                                                                                                                                                                                                                                                                                                                                                                                                                                                                                                                                                             |
| <b>Varscan [Galaxy version 0.1]</b>                            | Allows for filtering variants across a range of allele frequency thresholds with SNPs and INDELS called separately | <ul style="list-style-type: none"> <li>• Select your desired range of allele frequency thresholds = 100% - FA1, FA3; 90% - FA2, FA4 (Sup); 0% - FA1, FA3; 10% - FA2, FA4 (Non-Sup)</li> <li>• Minimum read depth = 8 (Sup); 3 (Non-Sup)</li> <li>• Minimum supporting reads = 1</li> <li>• Minimum base quality at a position to count a read = 24</li> <li>• Minimum frequency to call homozygote = FA1, FA3 - 100%; FA2, FA4 - 90%</li> <li>• p-value threshold for calling variants = 0.99</li> </ul>                                                                                                                                                                                                                                                                                                                                                                                                                                                                                                                                                                                                                                                                                                                                                                                                                 |

|                                                             |                               |                                                                                                                                                                                                                                                                                                                                                                                                                                                                                                                 |
|-------------------------------------------------------------|-------------------------------|-----------------------------------------------------------------------------------------------------------------------------------------------------------------------------------------------------------------------------------------------------------------------------------------------------------------------------------------------------------------------------------------------------------------------------------------------------------------------------------------------------------------|
| <b>VCFCombine</b><br>[Galaxy Version<br>1.0.0_rc1.0]        | Combines SNP<br>and INDEL VCF | <ul style="list-style-type: none"> <li>Select both SNP and INDEL files generated by the tool <i>Varscan</i>.</li> </ul>                                                                                                                                                                                                                                                                                                                                                                                         |
| <b>VCF-VCF intersect</b><br>[Galaxy version<br>1.0.0_rc1.0] | Performs<br>Subtraction       | <ul style="list-style-type: none"> <li>Mutant variant file was selected as the second VCF dataset and the NMSC variant file as the first VCF dataset. Then the following options were chosen to perform the subtraction:</li> <li>Union or intersection = Intersect</li> <li>Invert selection? = Yes</li> <li>compare records up to this many bp away (window size) = 30</li> <li>output whole loci when one alternate allele matches = Yes</li> <li>Advanced controls = Don't use advanced options.</li> </ul> |
| <b>SnpEff</b> [Galaxy<br>version 1.0]                       | Annotates<br>Variants         | <ul style="list-style-type: none"> <li>Input format = VCF</li> <li>Output format = Tabular</li> <li>Genome = <i>Caenorhabditis elegans</i>: WS220.64</li> <li>Upstream/Downstream length = 10000 bases</li> <li>Filter homozygous/heterozygous changes = No Filter</li> <li>Filter homozygous/heterozygous changes = None</li> <li>Chromosomal position = Use default (based on input type).</li> </ul>                                                                                                         |

Results from the above analysis can be downloaded from Galaxy and further subsetted according to individual need (*e.g.*, variants within coding regions or that occur on a particular chromosome). In addition, we recommend confirming candidate variants intended for experimental validation further by examining the individual non-mutant comparator and mutant alignments within a genome browser such as IGV (Robinson *et al.* 2011; Thorvaldsdóttir *et al.* 2013). This is to remove false positive candidates that are the result of a low number of reads in the Non-suppressed sibling strains. These are not called as variants in the Non-suppressed siblings and thus are not subtracted.

## REFERENCES

- Afgan, E., D. Baker, M. van den Beek, D. Blankenberg, D. Bouvier *et al.*, 2016 The Galaxy platform for accessible, reproducible and collaborative biomedical analyses: 2016 update. *Nucleic Acids Res* 44: W3-W10.
- Bolger, A. M., M. Lohse and B. Usadel, 2014 Trimmomatic: a flexible trimmer for Illumina sequence data. *Bioinformatics* 30: 2114-2120.
- Cingolani, P., V. M. Patel, M. Coon, T. Nguyen, S. J. Land *et al.*, 2012a Using *Drosophila melanogaster* as a Model for Genotoxic Chemical Mutational Studies with a New Program, SnpSift. *Front Genet* 3: 35.
- Cingolani, P., A. Platts, L. Wang le, M. Coon, T. Nguyen *et al.*, 2012b A program for annotating and predicting the effects of single nucleotide polymorphisms, SnpEff: SNPs in the genome of *Drosophila melanogaster* strain w1118; iso-2; iso-3. *Fly (Austin)* 6: 80-92.
- Li, H., and R. Durbin, 2009 Fast and accurate short read alignment with Burrows-Wheeler transform. *Bioinformatics* 25: 1754-1760.
- Li, H., B. Handsaker, A. Wysoker, T. Fennell, J. Ruan *et al.*, 2009 The Sequence Alignment/Map format and SAMtools. *Bioinformatics* 25: 2078-2079.
- McKenna, A., M. Hanna, E. Banks, A. Sivachenko, K. Cibulskis *et al.*, 2010 The Genome Analysis Toolkit: a MapReduce framework for analyzing next-generation DNA sequencing data. *Genome Res* 20: 1297-1303.
- Minevich, G., D. S. Park, D. Blankenberg, R. J. Poole and O. Hobert, 2012 CloudMap: a cloud-based pipeline for analysis of mutant genome sequences. *Genetics* 192: 1249-1269.
- Zuryn, S., S. Le Gras, K. Jamet and S. Jarriault, 2010 A strategy for direct mapping and identification of mutations by whole-genome sequencing. *Genetics* 186: 427-430.
