# Supplementary material for: Use of a Sibling Subtraction Method for Identifying Causal Mutations in Caenorhabditis elegans by Whole-Genome Sequencing
Source: PubMed Central journal article supplement (PMC5919755; doi:10.1534/g3.117.300135), 2017-12-12
Supplement: 669TableS1.pdf [file 669TableS1.pdf]

**Table S1. List of *nekl-2*; *nekl-3* suppressors.**

| Strains isolated from F1 semi-clonal screen    |              |                   |                    |              |
|------------------------------------------------|--------------|-------------------|--------------------|--------------|
| Strain Name                                    | Allele       | % Suppression (n) | Dominant/Recessive | Autosome/LGX |
| Strains subjected to SSM & WGS                 |              |                   |                    |              |
| WY1208                                         | <i>fd130</i> | 83 (223)          | Recessive          | LGX          |
| WY1209                                         | <i>fd131</i> | 87 (360)          | Recessive          | Autosome     |
| WY1210                                         | <i>fd132</i> | 50 (276)          | Dominant           | LGX          |
| WY1211                                         | <i>fd133</i> | 35 (422)          | Recessive          | Autosome     |
| WY1217                                         | <i>fd139</i> | 76 (235)          | Recessive          | LGX          |
| Strains NOT subjected to SSM & WGS             |              |                   |                    |              |
| WY1212                                         | <i>fd134</i> | 34 (387)          | Weak Dominant      | N.D.         |
| WY1213                                         | <i>fd135</i> | N.D.              | N.D.               | N.D.         |
| WY1214                                         | <i>fd136</i> | 25 (374)          | Weak Dominant      | N.D.         |
| WY1215                                         | <i>fd137</i> | 35 (277)          | Weak Dominant      | N.D.         |
| WY1216                                         | <i>fd138</i> | 48 (315)          | N.D.               | N.D.         |
| WY1218                                         | <i>fd140</i> | 47 (430)          | N.D.               | N.D.         |
| WY1220                                         | <i>fd142</i> | 37 (138)          | N.D.               | N.D.         |
| WY1221                                         | <i>fd143</i> | 33 (425)          | N.D.               | N.D.         |
| WY1222                                         | <i>fd144</i> | 33 (167)          | N.D.               | N.D.         |
| WY1223                                         | <i>fd145</i> | 32 (613)          | N.D.               | N.D.         |
| WY1224                                         | <i>fd146</i> | 31 (30)           | N.D.               | N.D.         |
| WY1225                                         | <i>fd147</i> | 30 (389)          | N.D.               | N.D.         |
| WY1267                                         | <i>fd151</i> | 63 (300)          | Recessive          | Autosome     |
| WY1268                                         | <i>fd152</i> | 55 (77)           | N.D.               | N.D.         |
| WY1269                                         | <i>fd153</i> | 79 (333)          | N.D.               | N.D.         |
| WY1270                                         | <i>fd154</i> | 51 (206)          | Recessive          | Autosome     |
| WY1271                                         | <i>fd155</i> | 94 (306)          | Recessive          | LGX          |
| WY1272                                         | <i>fd156</i> | N.D.              | N.D.               | N.D.         |
| WY1273                                         | <i>fd157</i> | N.D.              | N.D.               | N.D.         |
| WY1274                                         | <i>fd158</i> | N.D.              | N.D.               | N.D.         |
| WY1275                                         | <i>fd159</i> | N.D.              | N.D.               | N.D.         |
| WY1276                                         | <i>fd160</i> | N.D.              | N.D.               | N.D.         |
| Strains isolated from counter-selection screen |              |                   |                    |              |
| Strains NOT subjected to SSM & WGS             |              |                   |                    |              |
| WY1277                                         | <i>fd161</i> | 63 (260)          | N.D.               | N.D.         |
| WY1278                                         | <i>fd162</i> | 78 (639)          | Recessive          | Autosome     |
| WY1279                                         | <i>fd163</i> | 83 (121)          | N.D.               | N.D.         |
| WY1280                                         | <i>fd164</i> | N.D.              | N.D.               | N.D.         |
| WY1281                                         | <i>fd165</i> | 57 (130)          | N.D.               | N.D.         |
| WY1282                                         | <i>fd166</i> | 34 (938)          | Recessive          | Autosome     |
| WY1283                                         | <i>fd167</i> | 71 (219)          | N.D.               | N.D.         |
| WY1284                                         | <i>fd168</i> | N.D.              | N.D.               | N.D.         |

|        |              |          |           |          |
|--------|--------------|----------|-----------|----------|
| WY1285 | <i>fd169</i> | 86 (179) | N.D.      | N.D.     |
| WY1286 | <i>fd170</i> | 43 (112) | Recessive | Autosome |
| WY1287 | <i>fd171</i> | 77 (220) | N.D.      | N.D.     |
| WY1288 | <i>fd172</i> | 74 (282) | N.D.      | N.D.     |
| WY1289 | <i>fd173</i> | 13 (643) | Recessive | Autosome |
| WY1290 | <i>fd174</i> | 77 (137) | N.D.      | N.D.     |
| WY1291 | <i>fd175</i> | 85 (66)  | N.D.      | N.D.     |
| WY1292 | <i>fd176</i> | 78 (201) | N.D.      | N.D.     |
| WY1293 | <i>fd177</i> | N.D.     | N.D.      | N.D.     |
| WY1294 | <i>fd178</i> | 46 (190) | N.D.      | N.D.     |
| WY1295 | <i>fd179</i> | 84 (266) | N.D.      | N.D.     |
| WY1296 | <i>fd180</i> | 76 (223) | N.D.      | N.D.     |
| WY1297 | <i>fd181</i> | 80 (93)  | N.D.      | N.D.     |
| WY1298 | <i>fd182</i> | 30 (123) | Recessive | Autosome |
| WY1299 | <i>fd183</i> | N.D.     | N.D.      | N.D.     |
